# Supplementary material
Source: bioRxiv or medRxiv preprint supplement (https://www.biorxiv.org/content/biorxiv/early/2019/11/27/857037/DC2/embed/media-2.pdf)

Supplementary Figure S2: Representative scatter plot images of Annexin-PI by flow cytometry

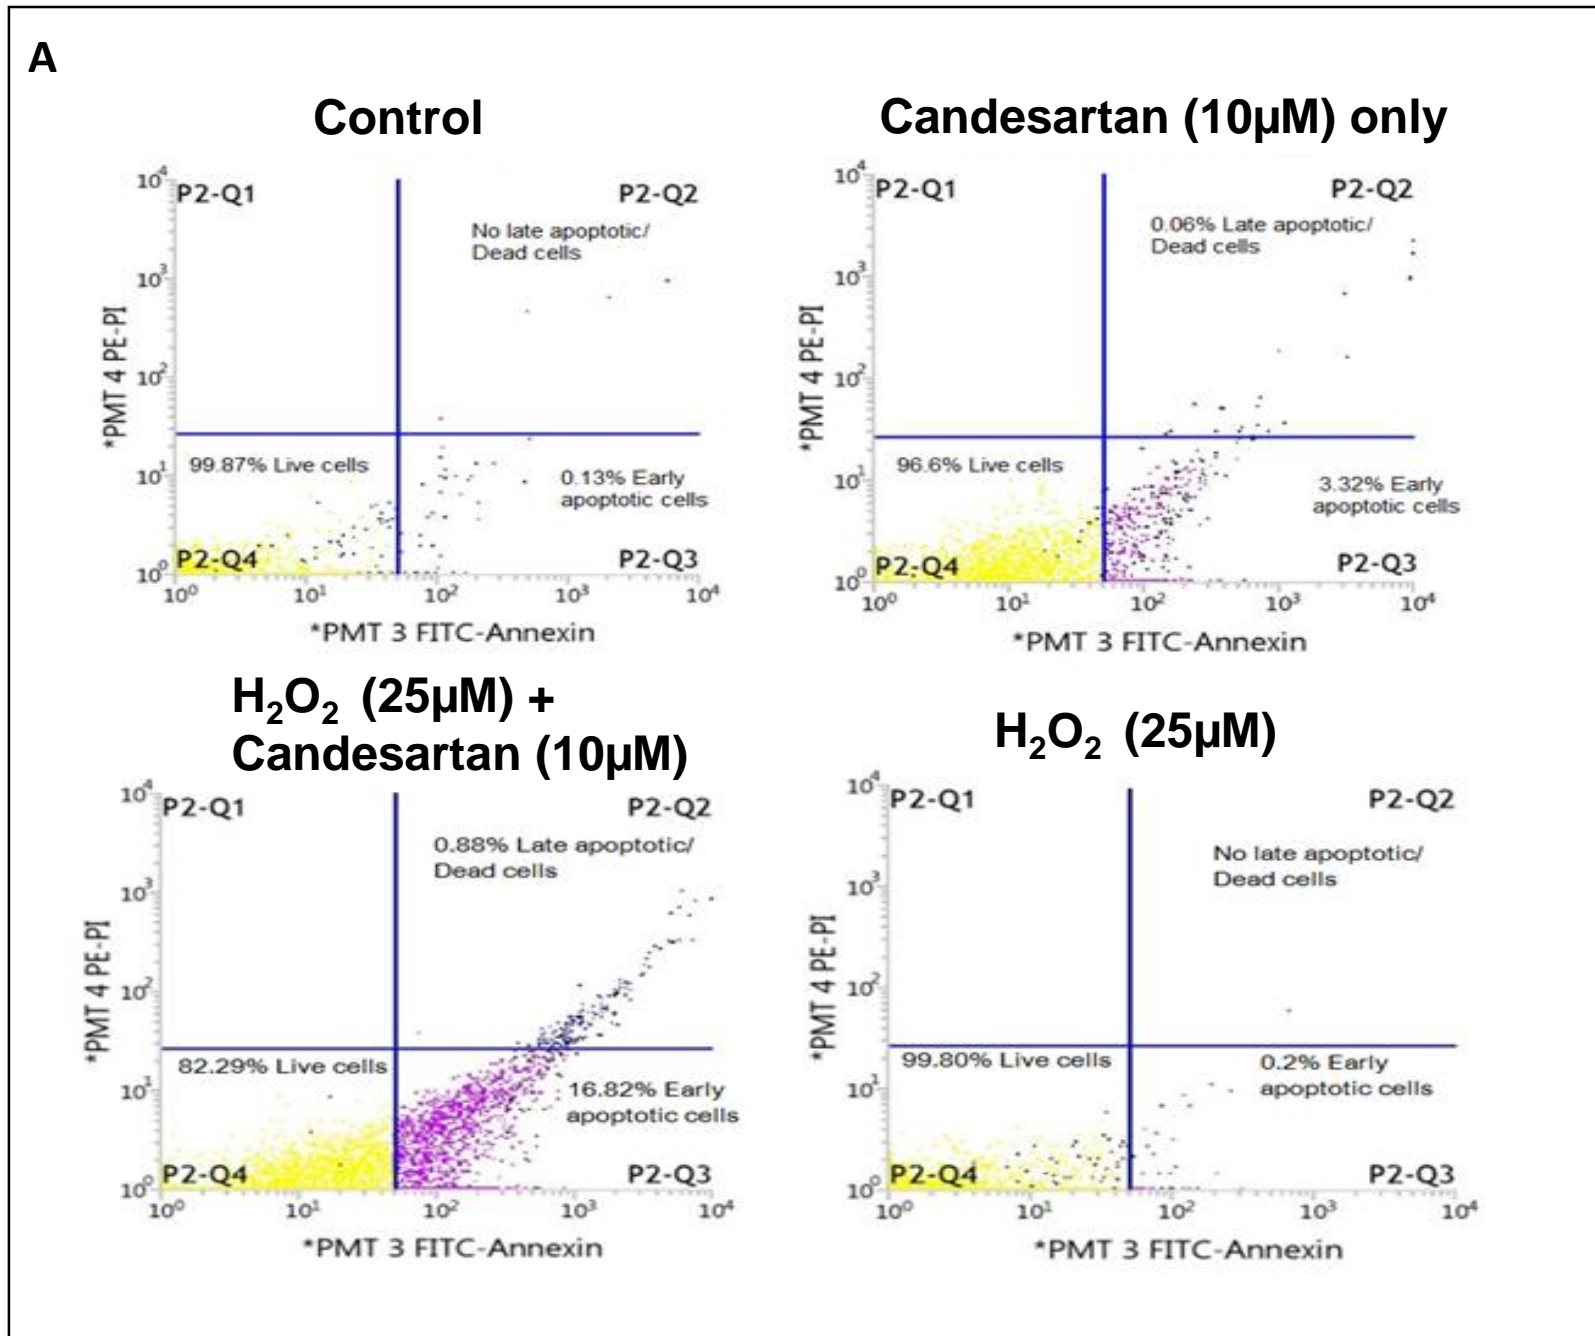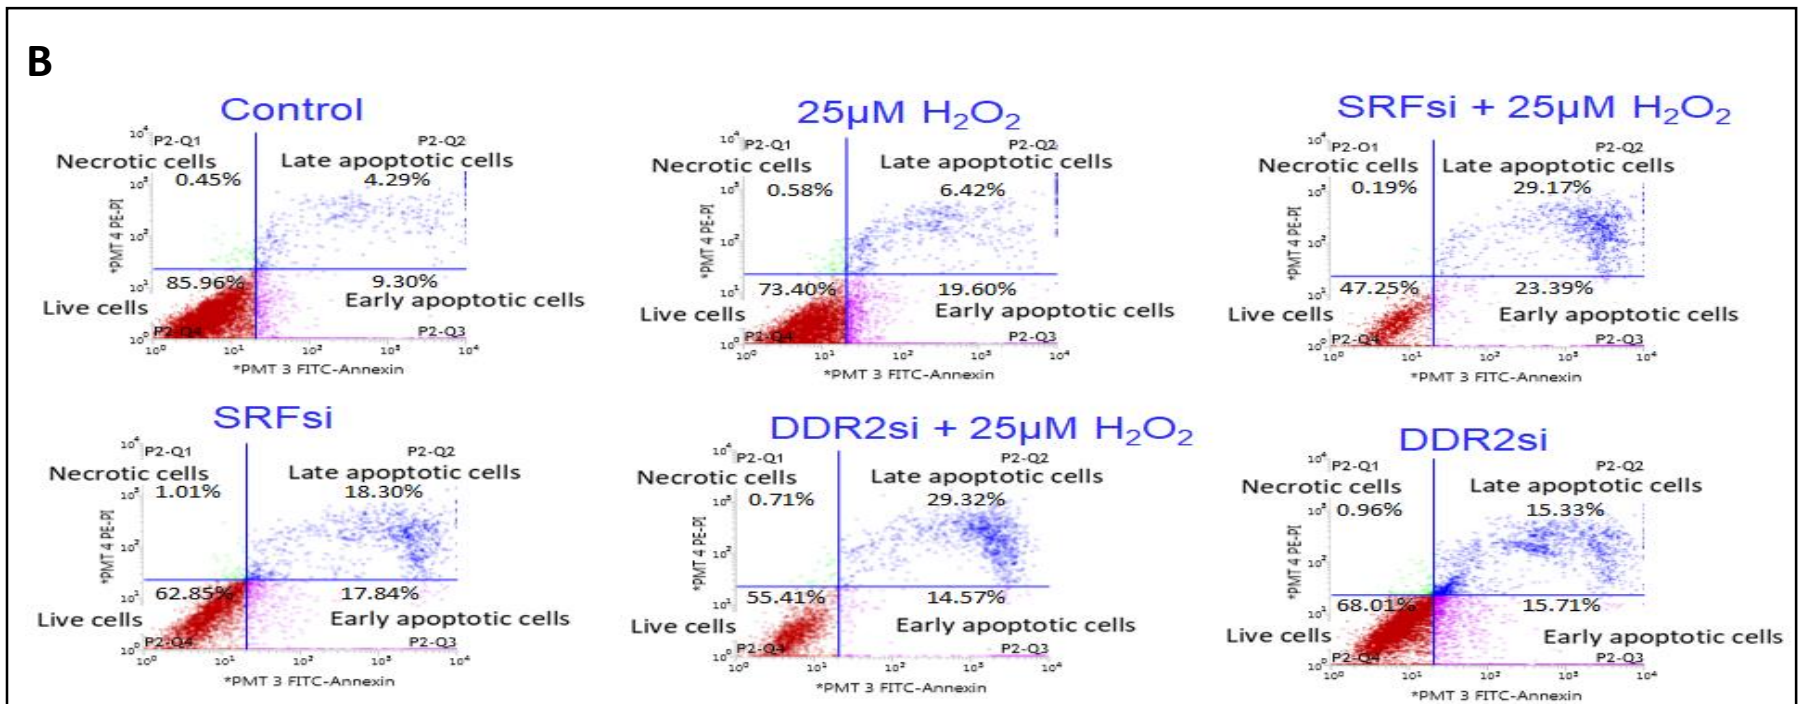

Supplement: Supplementary file [file media-2.pdf]
